# Supplementary material for: Single crystals of cyclodimeric zinc(ii) complexes containing 9,10-bis((isoquinolin-5-yloxy)methyl)anthracene: reversible adsorption of target molecules and recognition of CH2I2 in an SCSC mode
Source: Royal Society of Chemistry journal article supplement (doi:10.1039/d3ce00671a), 2023-01-01
Supplement: d3ce00671a1.pdf [file d3ce00671a1.pdf]

<Electronic Supplementary Information>

**Single crystals of cyclodimeric zinc(II) complexes containing 9,10-bis((isoquinolin-5-yloxy)methyl)anthracene: reversible adsorption of targeting molecules and recognition of CH<sub>2</sub>I<sub>2</sub> in SCSC mode**

Gyeongwoo Kim, Jihun Han, Dongwon Kim, and Ok-Sang Jung\*

Department of Chemistry, Pusan National University, Busan 46241, Republic of Korea Fax: (+82) 51-5163522;

Tel: (+82) 51-5103240; E-mail: oksjung@pusan.ac.kr

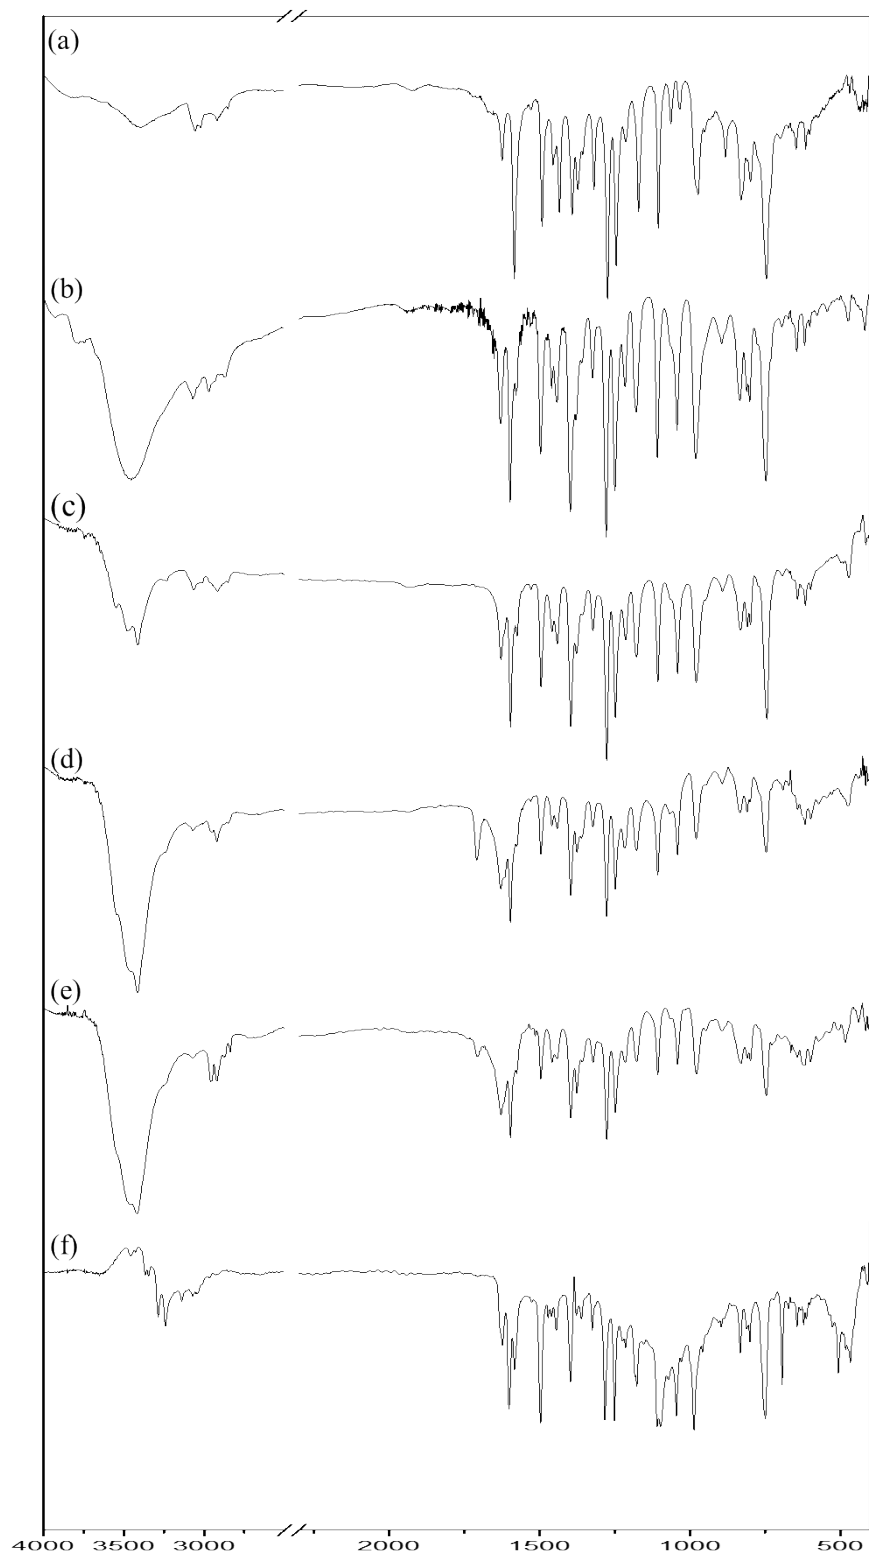

**Fig. S1.** IR spectra of L (a),  $[\text{ZnCl}_2\text{L}]_2 \cdot 5\text{C}_4\text{H}_8\text{O}$  (b),  $[\text{ZnCl}_2\text{L}]_2 \cdot 4o\text{-X} \cdot 2\text{C}_4\text{H}_8\text{O} \cdot 0.5\text{CH}_2\text{Cl}_2$  (c),  $[\text{ZnCl}_2\text{L}]_2 \cdot 4m\text{-X}$  (d),  $[\text{ZnCl}_2\text{L}]_2 \cdot 4p\text{-X}$  (e), and  $[\text{Zn}_2\text{Cl}_4\text{L}(\text{C}_6\text{H}_5\text{NH}_2)_2] \cdot 2\text{C}_6\text{H}_5\text{NH}_2$  (f).

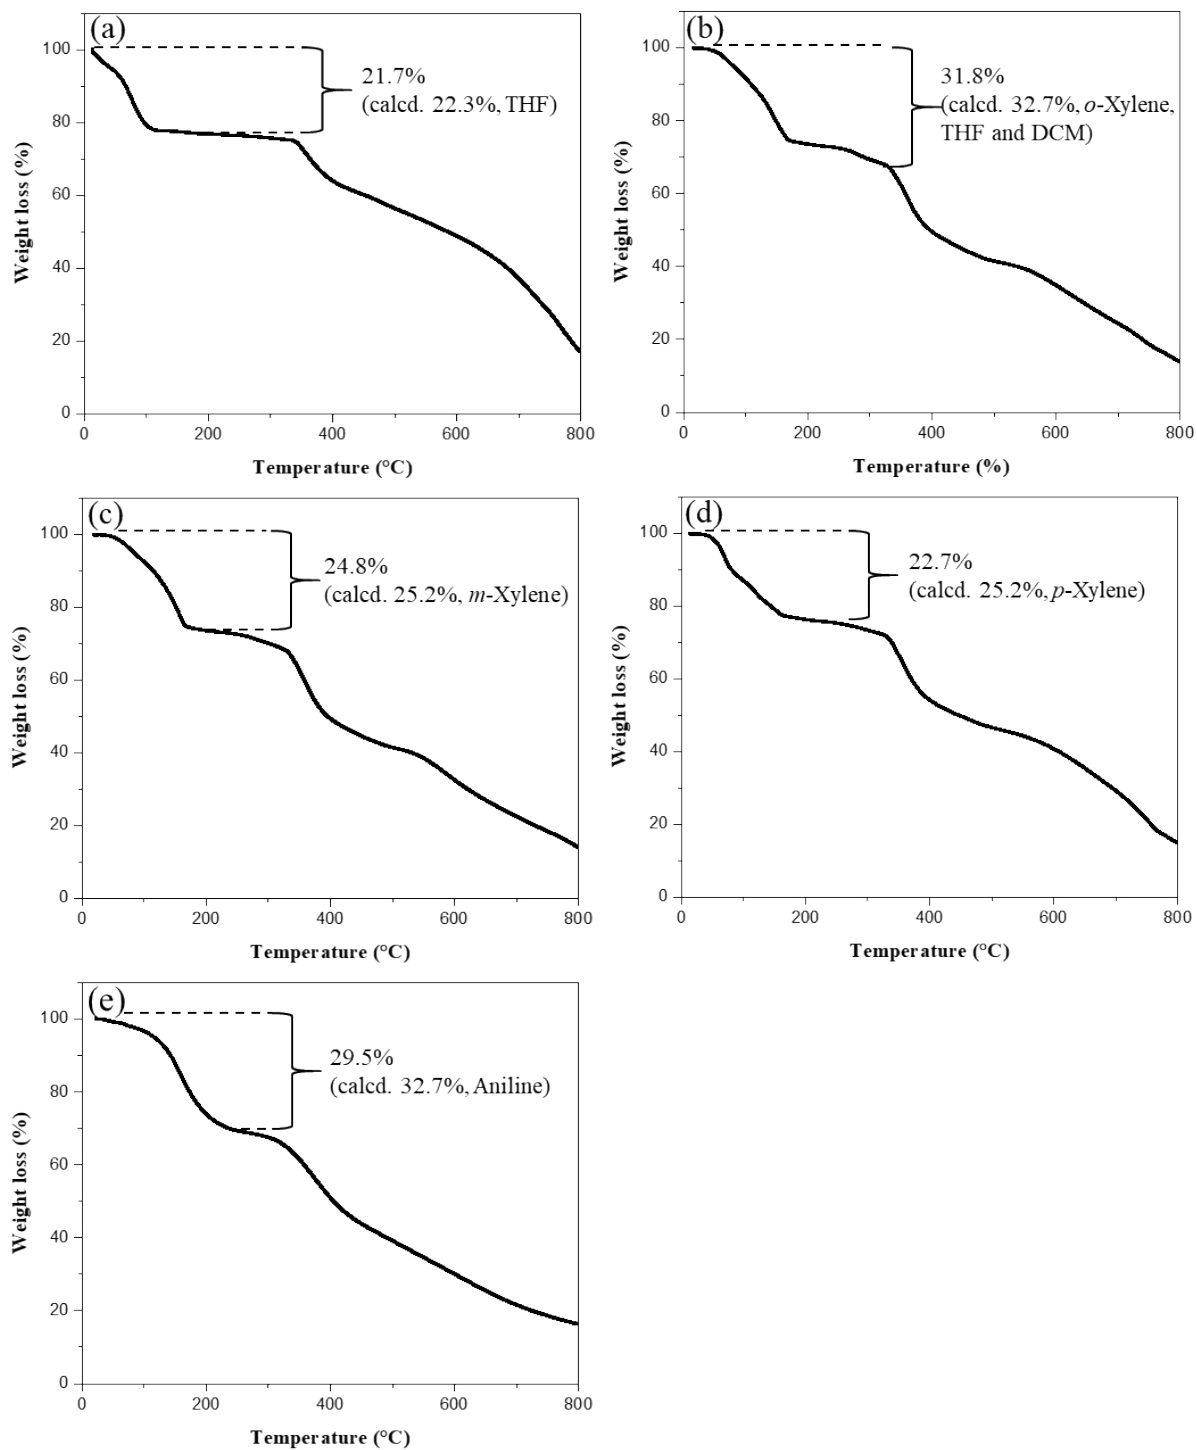

**Fig. S2.** TG curves of  $[\text{ZnCl}_2\text{L}]_2 \cdot 5\text{C}_4\text{H}_8\text{O}$  (a),  $[\text{ZnCl}_2\text{L}]_2 \cdot 4o\text{-X} \cdot 2\text{C}_4\text{H}_8\text{O} \cdot 0.5\text{CH}_2\text{Cl}_2$  (b),  $[\text{ZnCl}_2\text{L}]_2 \cdot 4m\text{-X}$  (c),  $[\text{ZnCl}_2\text{L}]_2 \cdot 4p\text{-X}$  (d), and  $[\text{Zn}_2\text{Cl}_4\text{L}(\text{C}_6\text{H}_5\text{NH}_2)_2] \cdot 2\text{C}_6\text{H}_5\text{NH}_2$  (e).

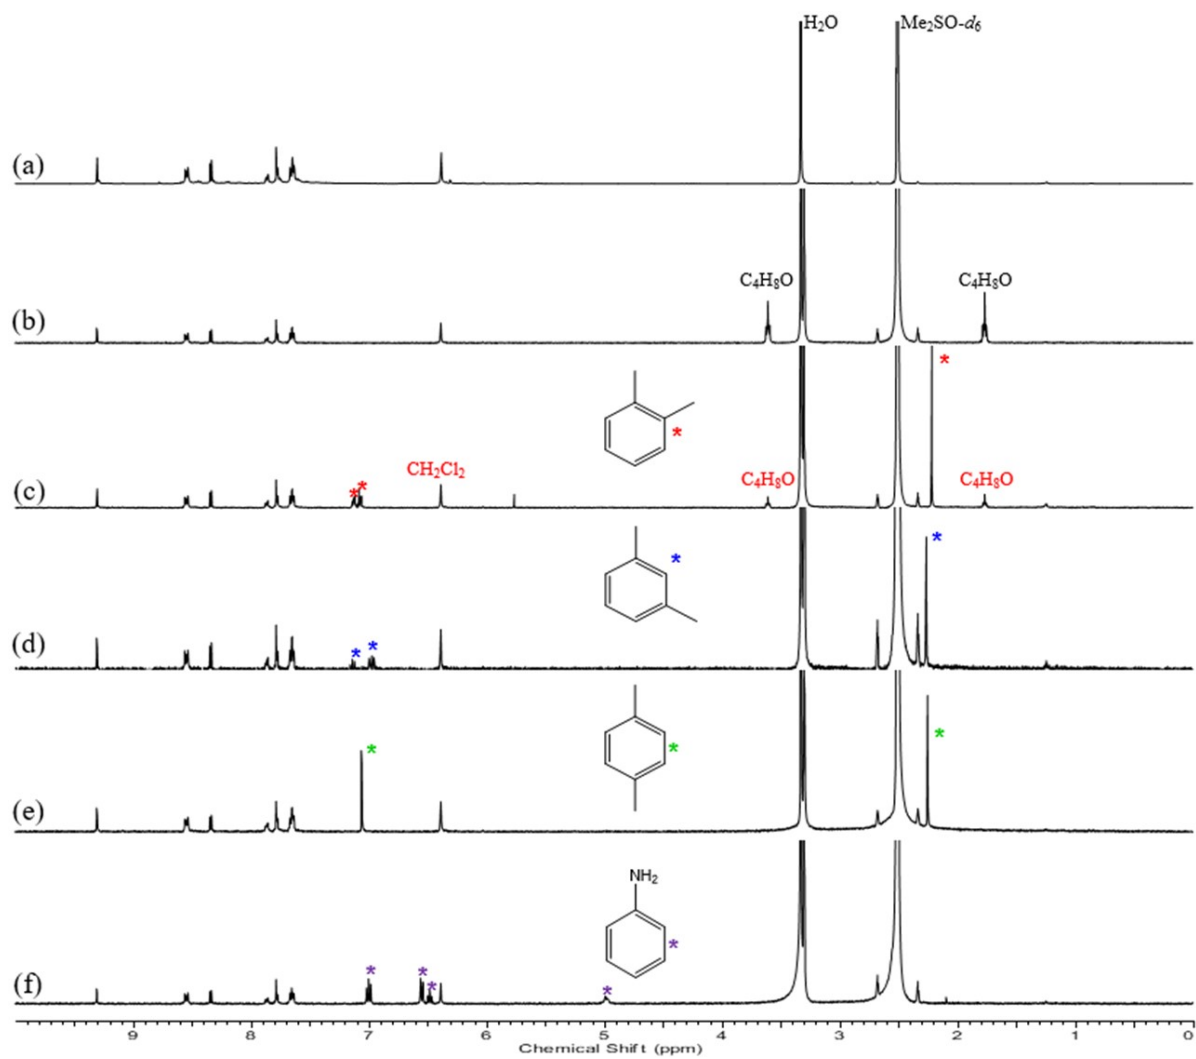

**Fig. S3.**  $^1\text{H}$  NMR spectra (dissociated in  $\text{Me}_2\text{SO}-d_6$ ) of L (a),  $[\text{ZnCl}_2\text{L}]_2 \cdot 5\text{C}_4\text{H}_8\text{O}$  (b),  $[\text{ZnCl}_2\text{L}]_2 \cdot 4o\text{-X} \cdot 2\text{C}_4\text{H}_8\text{O} \cdot 0.5\text{CH}_2\text{Cl}_2$  (c),  $[\text{ZnCl}_2\text{L}]_2 \cdot 4m\text{-X}$  (d),  $[\text{ZnCl}_2\text{L}]_2 \cdot 4p\text{-X}$  (e), and  $[\text{Zn}_2\text{Cl}_4\text{L}(\text{C}_6\text{H}_5\text{NH}_2)_2] \cdot 2\text{C}_6\text{H}_5\text{NH}_2$  (f).

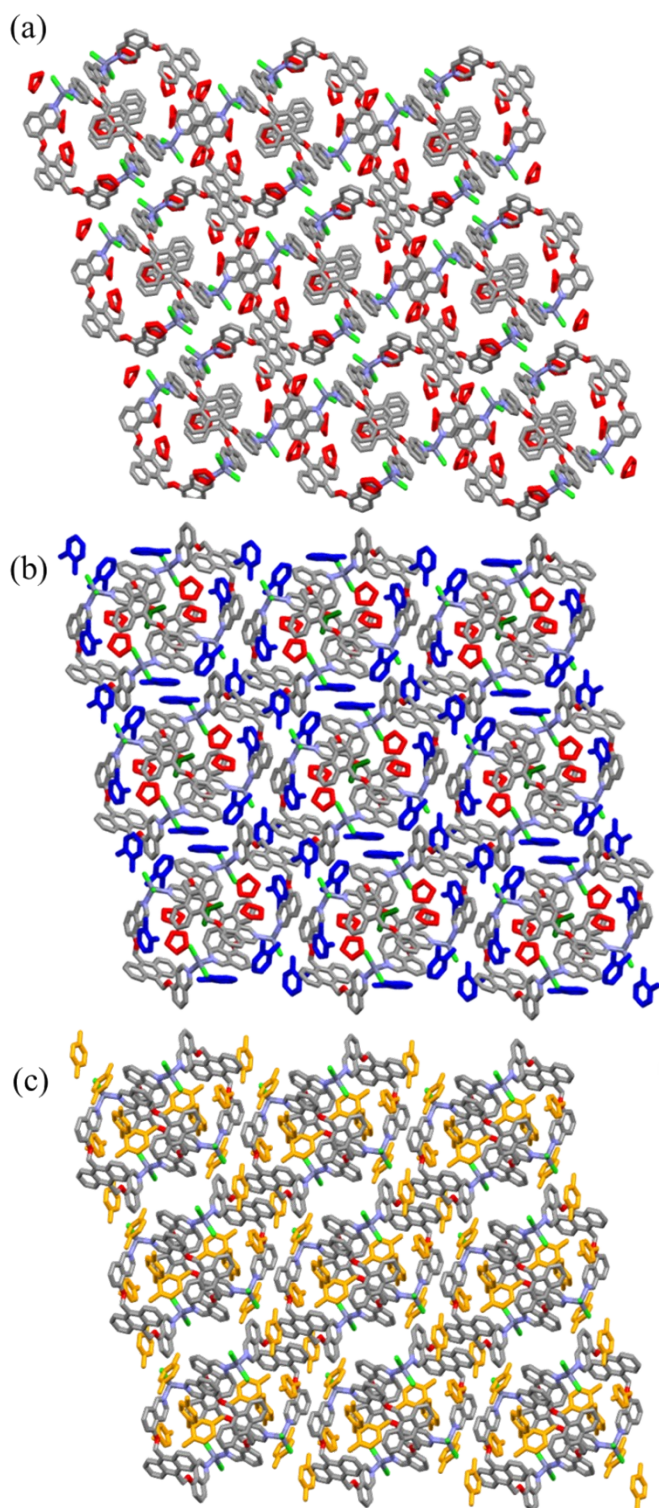

**Fig. S4.** Packing structures of [ZnCl<sub>2</sub>L]<sub>2</sub>·5C<sub>4</sub>H<sub>8</sub>O (a), [ZnCl<sub>2</sub>L]<sub>2</sub>·4*o*-X·2C<sub>4</sub>H<sub>8</sub>O·0.5CH<sub>2</sub>Cl<sub>2</sub> (b), and [ZnCl<sub>2</sub>L]<sub>2</sub>·4*p*-X (c). C<sub>4</sub>H<sub>8</sub>O (red), CH<sub>2</sub>Cl<sub>2</sub> (green), *o*-X (blue), and *p*-X (yellow).

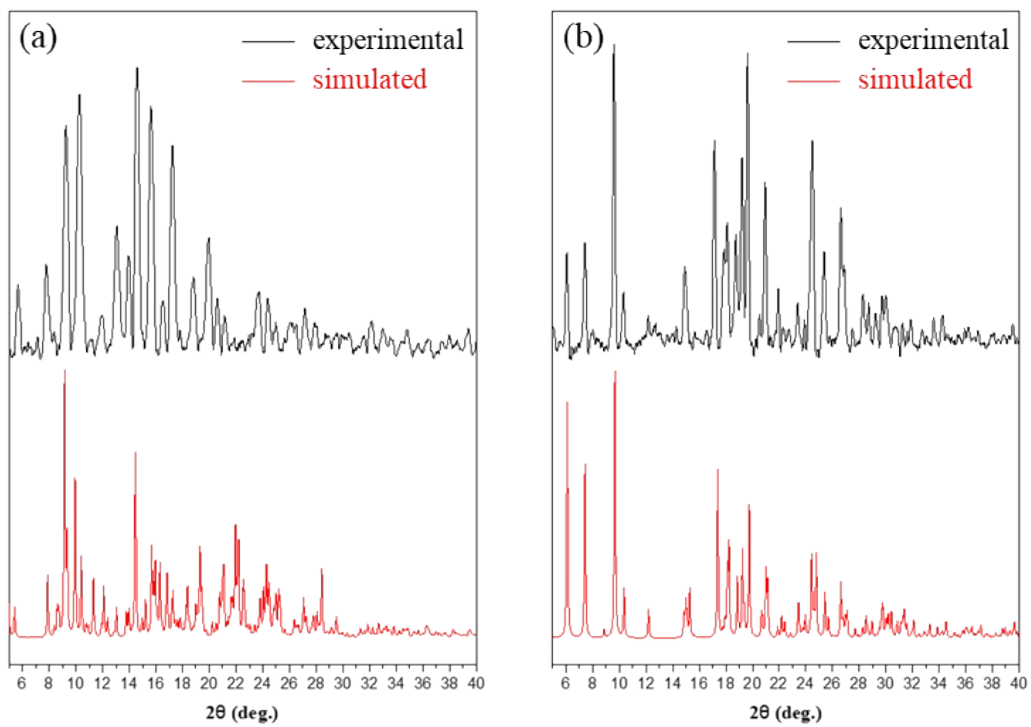

**Fig. S5.** PXRD patterns of  $[\text{ZnCl}_2\text{L}]_2 \cdot 5\text{C}_4\text{H}_8\text{O}$  (a) and  $[\text{Zn}_2\text{Cl}_4\text{L}(\text{C}_6\text{H}_5\text{NH}_2)_2] \cdot 2\text{C}_6\text{H}_5\text{NH}_2$  (b).

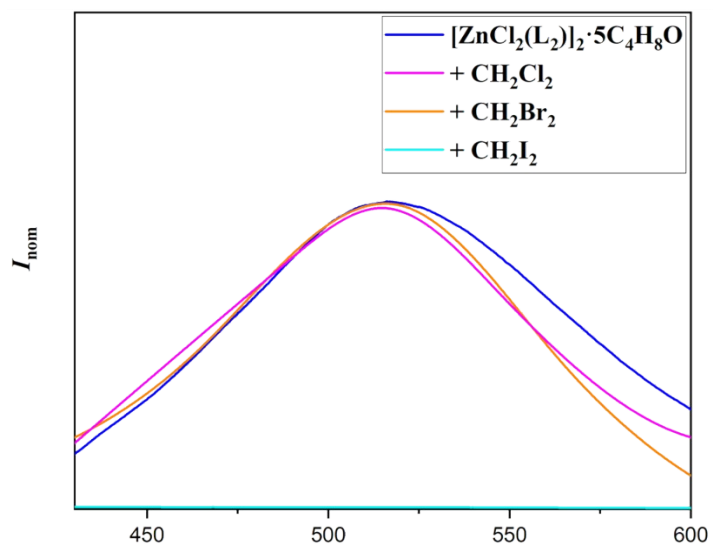

**Fig. S6.** Solid PL spectra at  $\lambda_{\text{ex}} = 350$  nm of crystals of  $[\text{ZnCl}_2\text{L}]_2 \cdot 5\text{C}_4\text{H}_8\text{O}$  (blue line), the crystals + one drop (20  $\mu\text{L}$ ) of the  $\text{CH}_2\text{Cl}_2$  (pink line), the crystals + one drop of the  $\text{CH}_2\text{Br}_2$  (orange line), and the crystals + one drop of the  $\text{CH}_2\text{I}_2$  (sky blue line).
